# Supplementary material for: Disturbance of coastal forests in East Africa: elephants promote forest butterflies while human impact supports Savannah species
Source: Research Square preprint supplement (doi:10.21203/rs.3.rs-6553277/v1), 2025-06-05
Supplement: Supplementary file 1 [file 4a7684578dd34d542fd00adc.xlsx]

## Sheet: A1
Disturbance of coastal forests in East Africa: elephants promote forest butterflies while human impact supports Savannah species
Table A1. Records of butterfly species in three forest types of the Arabuko Sokoke coastal forest. (prim+e: primary forest with elephants; prim-e: primary forest without elephants; second+e: secondary forest with elephants).
Species	prim+e	prim+e	prim+e	prim+e	prim+e	prim+e	prim+e	prim+e	prim-e	prim-e	prim-e	prim-e	prim-e	prim-e	prim-e	prim-e	second+e	second+e	second+e	second+e	second+e	second+e	second+e	second+e
Junonia oenone	0	0	0	0	0	0	0	0	0	0	0	0	0	0	0	0	0	1	0	0	0	1	0	0
Melanitis leda	0	2	1	1	0	1	1	0	0	0	1	0	0	0	0	0	2	0	0	0	1	2	0	1
Charaxes candiope	1	0	0	2	0	0	0	0	0	0	1	0	0	0	0	0	0	2	0	0	1	0	0	0
Charaxes zoolina	2	1	0	1	0	0	0	1	1	3	2	1	1	0	4	3	0	1	2	2	0	0	0	1
Byblia ilithyia	8	10	16	8	7	5	9	2	10	13	17	9	24	7	17	10	31	20	17	32	28	38	20	32
Hypolimnas misippus	1	2	2	1	1	0	2	0	0	1	3	0	0	1	0	0	1	1	0	1	2	2	0	2
Belenois creona	0	0	0	0	0	0	0	0	0	0	0	0	0	0	0	0	0	0	0	0	1	0	0	0
Colotis euippe	0	0	0	0	1	0	0	0	0	0	0	0	0	0	0	0	0	0	2	0	0	2	0	0
Charaxes castor	2	1	1	2	5	0	4	2	1	3	2	1	1	0	2	1	1	1	2	1	0	1	0	3
Bicyclus safitza safitza	39	30	31	18	22	6	27	16	7	17	28	11	21	38	18	36	7	15	25	30	26	13	15	19
Charaxes varanes vologeses	4	4	9	11	9	0	4	3	3	4	4	4	4	9	7	2	0	0	3	4	0	2	0	6
Charaxes jahlusa kenyensis	16	5	1	7	5	0	5	4	16	25	46	17	20	27	35	36	25	76	84	95	38	66	38	76
Junonia natalica	0	1	0	0	1	0	0	0	0	0	0	0	0	0	0	0	0	0	0	0	0	0	0	0
Eronia cleodora	0	0	0	0	0	0	0	0	0	0	0	0	0	0	0	0	0	0	0	0	1	0	0	0
Belenois thysa	0	0	0	0	0	0	0	0	0	0	0	0	0	0	0	0	0	0	0	0	0	0	0	1
Charaxes brutus	1	2	0	1	2	0	1	3	0	0	1	0	0	0	0	3	0	0	0	0	0	0	0	0
Pseudacreaea boisduvali	0	0	0	0	0	0	0	0	0	0	0	0	0	0	0	1	0	0	0	0	0	0	0	0
Neptis laeta	1	0	0	0	0	0	0	0	0	0	0	0	0	0	0	0	0	0	0	0	0	0	0	0
Charaxes guderiana rabaiensis	7	2	0	1	2	0	0	0	0	0	0	1	0	0	0	2	1	0	2	0	4	0	1	6
Euphaedra neophron littoralis	1	4	0	3	0	0	1	2	0	1	0	0	0	0	0	0	0	1	0	0	0	0	0	0
Charaxes cithaeron	28	30	17	52	50	5	29	49	24	43	80	31	33	44	24	35	2	11	18	26	31	12	3	18
Charaxes etesipe gordoni	2	1	2	1	1	0	2	0	1	5	0	0	0	0	0	0	0	0	0	0	0	1	0	0
Charaxes lasti	0	0	0	0	3	0	0	0	0	0	0	0	0	0	0	0	0	0	0	1	1	0	0	0
Euxanthe wakefieldi	1	0	0	1	0	1	1	1	0	0	0	1	0	2	2	0	0	0	0	0	0	1	0	1
Euryphura achlys	4	5	1	4	5	3	6	6	2	0	6	2	5	2	4	3	0	3	1	1	0	0	0	0
Eurytela dryope angulata	3	1	1	3	0	0	0	0	0	0	0	0	0	0	0	0	0	0	0	0	0	0	0	0
Neptis saclava	3	1	4	0	3	0	1	1	1	0	0	0	0	0	1	0	2	1	1	0	0	0	0	1
Charaxes protoclea azota	2	3	1	4	6	1	2	13	4	1	7	7	1	7	0	2	1	1	5	3	9	3	0	2
Appias lasti	0	0	0	0	0	0	0	0	0	0	0	0	0	0	0	0	0	1	0	0	0	0	0	0
Nephronia thalassina	0	0	0	0	0	0	0	0	0	0	0	0	0	0	0	0	0	0	1	0	0	0	0	0

## Sheet: A2
Disturbance of coastal forests in East Africa: elephants promote forest butterflies while human impact supports Savannah species
Table A2. Ecological and morphological charcteristics of butterfly species in three forest types of the Arabuko Sokoke coastal forest.
Species	Family	Distribution	Larval food plant type	Hemeroby index	Savannah index	Water Index	Tree Index	Food plant	Habitat preference (adult)	Distribution	Wing length male (mm; according to Larsen 1991)	Ecological characteristics	Generalist/Specialist	Wing colors	Colour classes
Appias lasti	Pieridae	3	3	2	2	2	3	polyphagous	forest	regional	26	in coastal forest and woodland	Specialist	white, yellow	light
Belenois creona	Pieridae	4	3	3	4	2	1	polyphagous	mixed	continental	23	Common butterfly of the afrotropical realm, found in various habitats	Generalist	largely white, with orange/black wing-tips	light
Belenois thysa	Pieridae	3	3	2	1	3	2	oligophagous	woodland	regional	31	generalist, weakly linked to forest ecosystems	Generalist	white, yellow	light
Bicyclus safitza safitza	Nymphalidae	4	1	3	4	2	2	oligophagous	mixed	continental	28.75	generalist, little shadow to open forests, low dispersal power	Generalist	dark	dark
Byblia ilithyia	Nymphalidae	5	1	3	4	1	1	oligophagous	mixed	continental	27.5	generalist, all habitats	Specialist	red, black	medium
Charaxes brutus	Namphalidae	4	3	2	2	3	3	polyphagous	forest	continental	48.75	forest species that needs no closed forest for its existence	Specialist	black, white band	dark
Charaxes candiope	Nymphalidae	4	3	3	3	1	1	monophagous	mixed	continental	53.75	ubiquitous, also in gardens and cultivated land	Generalist	white, orange, black	medium
Charaxes castor	Nymphalidae	4	2	3	3	1	2	polyphagous	mixed	continental	51.25	ubiquitous	Generalist	black, orange	dark
Charaxes cithaeron	Nymphalidae	3	3	2	2	2	3	polyphagous	forest	regional	55	evergreen forests, but also gardens in Nairobi suburbs	Generalist	black, blue	dark
Charaxes etesipe gordoni	Nymphalidae	4	3	2	2	2	3	polyphagous	forest	continental	41.25	afrotropical forest	Generalist	black, with blue and white dots	dark
Charaxes guderiana rabaiensis	Nymphalidae	3	3	2	2	2	3	oligophagous	woodland	regional	35	Brachystegia woodlands, Niombo woodlands, afrotropical realm	Specialist	black with white bands	dark
Charaxes jahlusa kenyensis	Nymphalidae	3	3	2	4	2	2	polyphagous	woodland	regional	32.5	open Acacia woodland and Brachystegia forest	Generalist	Largely orange	medium
Charaxes lasti	Nymphalidae	1	3	1	3	3	3	oligophagous	forest	local	46.25	coastal forest	Specialist	Largely orange	medium
Charaxes protoclea azota	Nymphalidae	4	3	1	3	3	3	polyphagous	forest	continental	48.75	coastal forest	Specialist	Black with orange	dark
Charaxes varanes vologeses	Nymphalidae	4	3	2	3	2	2	polyphagous	mixed	continental	52.5	most common, widespread, and well-known member of the genus	Generalist	Brown with white	medium
Charaxes zoolina	Nymphalidae	3	3	2	4	1	1	oligophagous	mixed	regional	26.25	butterfly of the arid zone	Specialist	Largely white with brown	light
Colotis euippe	Pieridae	4	3	2	4	2	1
Eronia cleodora	Pieridae	4	3	3	2	2	2	polyphagous	woodland	continental	29	Common butterfly of the afrotropical realm, found in various habitats	Generalist	Largely white, with black bands	light
Euphaedra neophron littoralis	Nymphalidae	3	3	2	1	2	3	polyphagous	forest	regional	35	generalist, in need of the presence of trees	Generalist	Blue, yellow, black	medium
Euryphura achlys	Nymphalidae	3	3	1	1	3	3	polyphagous	forest	regional	32.5	forest species	Specialist	Light blue with black dots	dark
Eurytela dryope angulata	Nymphalidae	4	2	2	2	3	3	polyphagous	woodland	continental	28.75	along hedge structures and in open forests	Generalist	Brown with orange	medium
Euxanthe wakefieldi	Nymphalidae	2	3	1	1	3	3	polyphagous	forest	regional	42.5	specialised forest species	Specialist	White with blue and black	medium
Hypolimnas misippus	Nymphalidae	5	1	4	3	2	1	polyphagous	mixed	continental	38.75	generalist, more often in cultivated areas than in pristine habitats	Generalist	Black with white	medium
Junonia natalica	Pieridae	3	1	2	2	2	2	oligophagous	woodland	regional	31.25	along hedge structures and in open forests	Specialist	Largely bron and black	dark
Junonia oenone	Nyamphalidae	4	1	4	4	1	1	oligophagous	mixed	continental	27.5	savannah species	Generalist	Dark, blue, white	dark
Melanitis leda	Nyamphalidae	5	1	3	3	2	1	polyphagous	mixed	continental	41.25	shadow, cultivated land	Generalist	Light brown	medium
Nephronia thalassina	Pieridae	4	3	2	2	3	3	monophagous	woodland	continental	29	Mixed habitats	Generalist	White with some black bands	light
Neptis laeta	Nympahlidae	4	2	2	2	3	3	polyphagous	forest	continental	25	forests and woodlands	Specialist	Largely black, with white bands	dark
Neptis saclava	Nymphalidae	4	2	3	2	3	3	polyphagous	woodland	continental	22	generalist; forest edges and canopies (?)	Generalist	Largely black, with white bands	medium
Pseudacreaea boisduvali	Nmaphlidae	4	3	1	1	3	3	oligophagous	forest	continental	41	specialised forest species	Specialist	Orange with black	medium
Larsen TB (1991) The butterflies of Kenya and their natural history. Oxford University Press, Oxford ; New York
